# Supplementary material for: Effects of halogens on European air-quality
Source: Royal Society of Chemistry journal article supplement (doi:10.1039/c7fd00026j), 2017-01-01
Supplement: c7fd00026j1.pdf [file c7fd00026j1.pdf]

Supplement of

## “Effects of halogens on European air-quality”

T. M. Sherwen et al.

This document contains two tables and five figures.

**Table S11** - Scaling applied to VOC emissions used in simulation.

| Species      | Scaling |
|--------------|---------|
| $C_3H_8$     | 2       |
| Acetaldehyde | 4       |
| $CH_2O$      | 4       |
| Acetone      | 1       |

Table footnote: The base emissions, prior to scaling, for  $C_3H_8$  are assumed to be equivalent to  $C_2H_6$  and acetaldehyde emissions are used to scale  $CH_2O$  and acetone emissions. A scaling of four is applied to acetaldehyde.

**Table S12** - Definition of families.

| Family                                                  | Definition                                                                                                                   |
|---------------------------------------------------------|------------------------------------------------------------------------------------------------------------------------------|
| particulate matter less than 2.5 microns ( $PM_{2.5}$ ) | $1.51 * ([NH_4] + [NIT] + [SO_4]) + [BCPI] + [BCPO] + 1.2 * ((OCPI * 1.24) + OCPO) + [DST1] + 0.38 * [DST2] + 2.42 * [SALA]$ |

Table footnote: Definition of particulate matter less than 2.5 microns ( $PM_{2.5}$ ) used here. Where “NIT”=nitrate aerosol, “BCPI”=Hydrophilic black carbon aerosol, “BCPO”=Hydrophobic black carbon aerosol, “OCPI”=Hydrophilic organic carbon aerosol, “OCPO”=Hydrophobic organic carbon aerosol, “DST1”=Dust aerosol (with  $R_{eff} = 0.7$  microns), “DST2”=Dust aerosol, ( $R_{eff} = 1.4$  microns), and “SALA”=Accumulation mode sea salt aerosol ( $R_{eff} = 0.1 - 2.5$  microns). The scaling factors used assume an average RH of 50% for the domain.

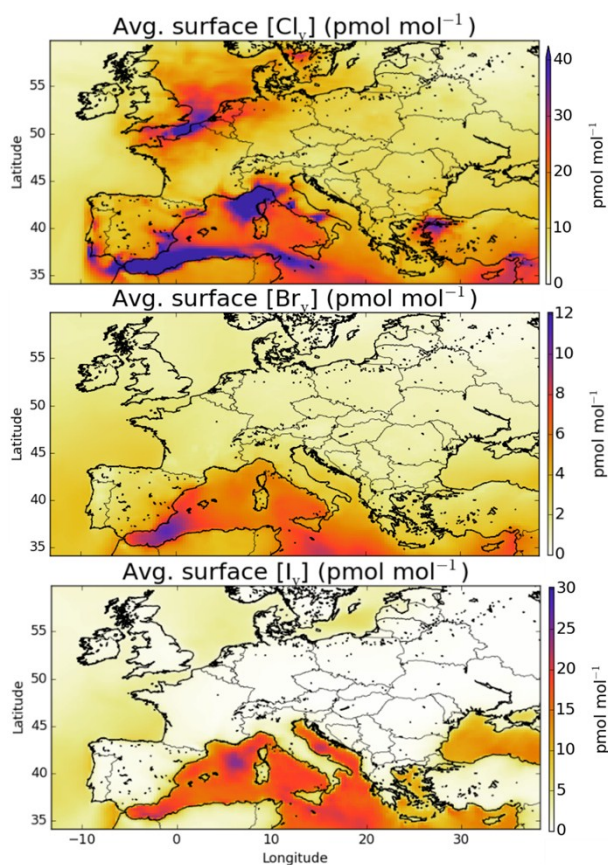

**Figure S11** - Modelled surface mixing ratios/concentrations of  $\text{X}_y$  ( $\text{X}=\text{Cl}, \text{Br}, \text{I}$ ) in “HAL” simulation for the summer observation period (2015/06/29-2015/08/01). Maximum values in figure are 27, 11 and 99  $\text{pmol mol}^{-1}$ , for  $\text{I}_y$ ,  $\text{Br}_y$  and  $\text{Cl}_y$  respectively. When  $\text{X}_y$  is the sum of inorganic halogens.

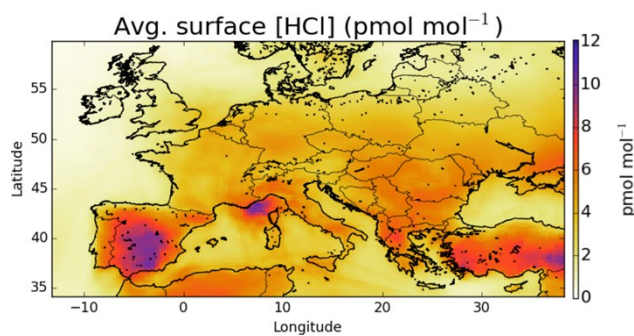

**Figure S12** - Modelled surface mixing ratio of  $\text{HCl}$  in “HAL” simulation for the summer observation period (2015/06/29-2015/08/01) .

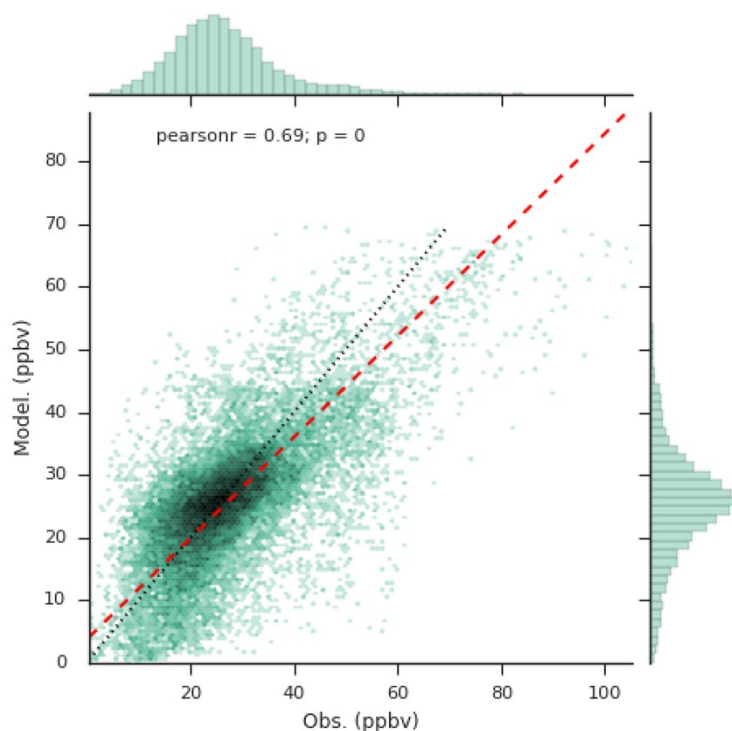

**Fig. S13** Comparison of observed and modelled  $O_3$  concentrations at UK AURN background sites (N=63) for the observation period (2015/06/29-2015/08/01). Red line shows orthogonal distance regression. Values are coloured in hexbins by log of number density, with probability distributions shown. Line of equality is shown in dashed black.

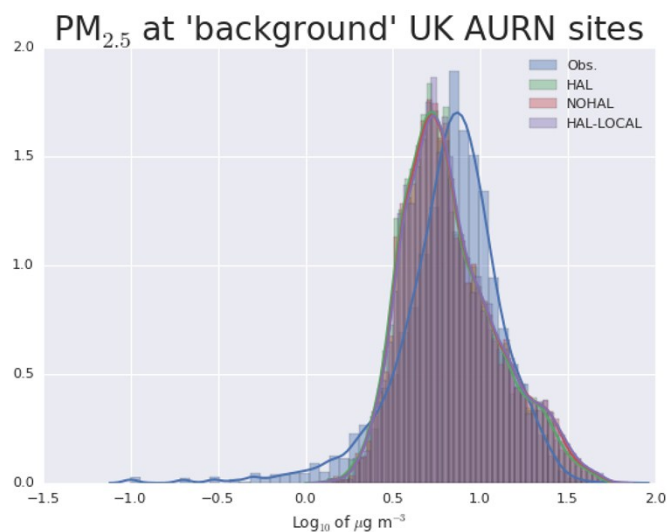

**Fig. S14** Probability distribution function of the log of observed and modelled  $PM_{2.5}$  concentrations at UK AURN background sites (N=39) for the observation period (29th June-1st August 2015). Values are shown for the simulation with halogens (“HAL”), without halogens (“NOHAL”), and with halogens only with the European domain (“LOCAL-HAL”).

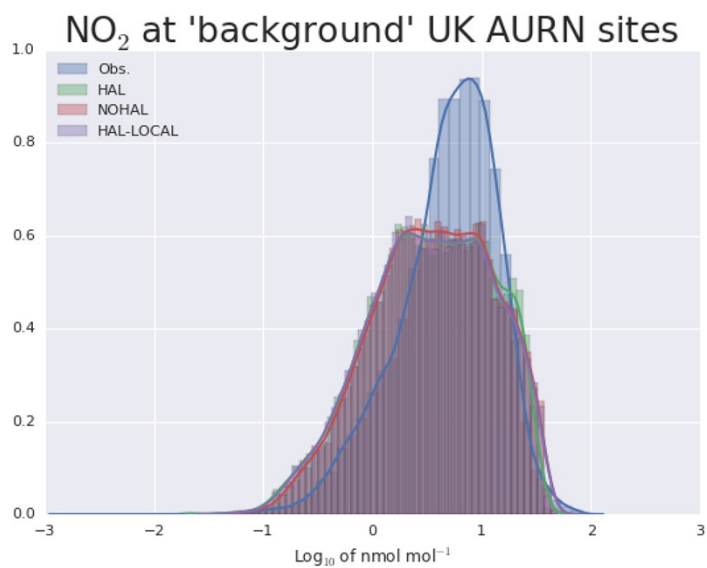

**Fig. S15** Probability distribution function of the log of observed and modelled NO<sub>2</sub> concentrations at UK AURN background sites (N=62) for the observation period (29<sup>th</sup> June-1<sup>st</sup> August 2015). Values are shown for the simulation with halogens (“HAL”), without halogens (“NOHAL”), and with halogens only with the European domain (“LOCAL-HAL”).
